# Supplementary material for: Nutritive Value of 11 Bee Pollen Samples from Major Floral Sources in Taiwan
Source: MDPI journal article supplement (doi:10.3390/foods10092229), 2021-09-20
Supplement: s1 [file s1]

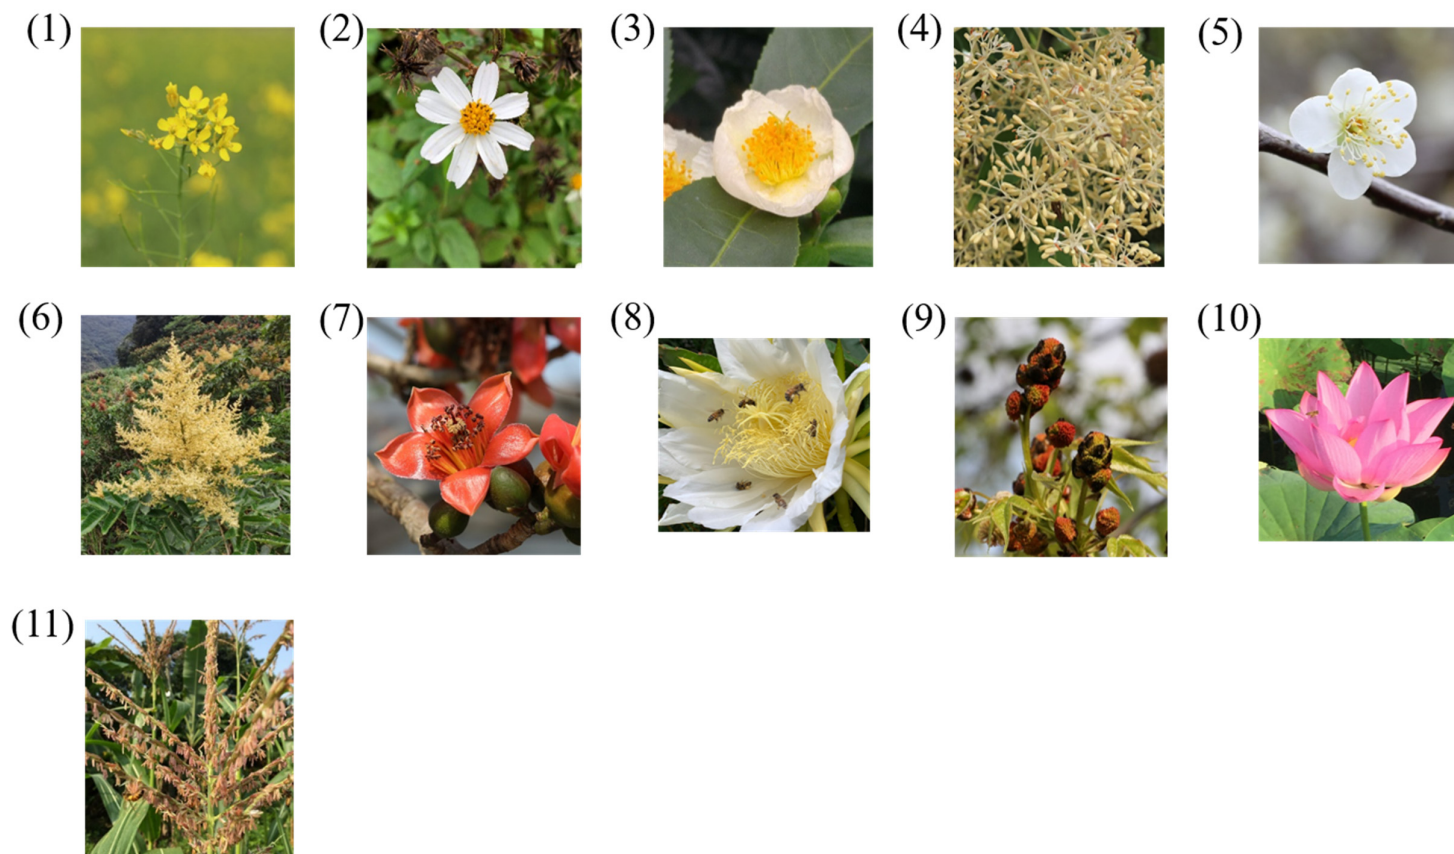

Figure S1. Flowers of botanical origins for bee pollen samples. (1) *Brassica napus*, (2) *Bidens pilosa* var. *radiata*, (3) *Camellia sinensis*, (4) *Fraxinus griffithii*, (5) *Prunus mume*, (6) *Rhus chinensis* var. *roxburghii*, (7) *Bombax ceiba*, (8) *Hylocereus costaricensis*, (9) *Liquidambar formosana*, (10) *Nelumbo nucifera*, (11) *Zea mays*.

Table S1. Chemical score in bee pollens compared to the minimum requirements of honey bees.

| Amino acids   | Bn     | Bp     | Cs     | Fg     | Pm     | Rc     | Bc     | Hc     | Lf     | Nn     | Zm     | Average |
|---------------|--------|--------|--------|--------|--------|--------|--------|--------|--------|--------|--------|---------|
| Arginine      | 158.81 | 116.43 | 151.64 | 145.85 | 145.28 | 129.68 | 150.10 | 167.83 | 213.15 | 170.16 | 143.78 | 153.88  |
| Histidine     | 114.39 | 297.73 | 164.17 | 213.83 | 136.07 | 133.56 | 166.23 | 146.15 | 65.26  | 182.47 | 117.95 | 157.98  |
| Isoleucine    | 111.22 | 104.18 | 113.25 | 114.11 | 101.19 | 103.69 | 116.80 | 134.48 | 109.39 | 130.47 | 97.84  | 112.42  |
| Leucine       | 148.38 | 143.33 | 153.78 | 151.13 | 138.28 | 139.07 | 141.57 | 168.95 | 173.27 | 162.18 | 133.13 | 150.28  |
| Lysine        | 233.68 | 202.43 | 196.79 | 192.80 | 188.44 | 204.62 | 187.78 | 245.94 | 261.70 | 232.61 | 194.08 | 212.81  |
| Methionine    | 86.51  | 83.20  | 89.75  | 92.16  | 64.78  | 85.59  | 99.43  | 109.19 | 110.57 | 102.08 | 45.68  | 88.09   |
| Phenylalanine | 271.66 | 325.82 | 292.20 | 284.10 | 265.91 | 279.10 | 267.54 | 331.23 | 242.68 | 288.27 | 224.91 | 279.40  |
| Threonine     | 259.19 | 231.80 | 239.04 | 241.65 | 231.65 | 237.73 | 246.37 | 267.56 | 214.01 | 264.98 | 245.34 | 243.58  |
| Tryptophan    | 101.18 | 107.92 | 100.64 | 62.66  | 77.12  | 186.97 | 61.99  | 125.24 | 58.84  | 75.18  | 55.90  | 92.15   |
| Valine        | 120.80 | 128.26 | 130.78 | 132.72 | 127.40 | 124.25 | 139.36 | 166.16 | 46.33  | 146.62 | 144.60 | 127.93  |
| Average       | 160.58 | 174.11 | 163.20 | 163.10 | 147.61 | 162.43 | 157.72 | 186.27 | 149.52 | 175.50 | 140.32 | 161.85  |

Table S2. Chemical score in bee pollens compared to the minimum requirements of adult humans.

| Amino acids                 | Bn     | Bp     | Cs     | Fg     | Pm     | Rc     | Bc     | Hc     | Lf     | Nn     | Zm     | Average |
|-----------------------------|--------|--------|--------|--------|--------|--------|--------|--------|--------|--------|--------|---------|
| Histidine                   | 114.39 | 297.73 | 164.17 | 213.83 | 136.07 | 133.56 | 166.23 | 146.15 | 65.26  | 182.47 | 117.95 | 157.98  |
| Isoleucine                  | 148.30 | 138.91 | 151.00 | 152.15 | 134.92 | 138.26 | 155.74 | 179.31 | 145.85 | 173.96 | 130.45 | 149.89  |
| Leucine                     | 113.17 | 109.32 | 117.29 | 115.27 | 105.47 | 106.07 | 107.97 | 128.86 | 132.16 | 123.70 | 101.54 | 114.62  |
| Lysine                      | 155.79 | 134.95 | 131.19 | 128.54 | 125.62 | 136.41 | 125.19 | 163.96 | 174.47 | 155.07 | 129.39 | 141.87  |
| Methionine                  | 81.10  | 78.00  | 84.14  | 86.40  | 60.74  | 80.24  | 93.21  | 102.37 | 103.66 | 95.70  | 42.83  | 82.58   |
| Threonine                   | 169.04 | 151.17 | 155.90 | 157.60 | 151.08 | 155.04 | 160.68 | 174.49 | 139.57 | 172.81 | 160.01 | 158.85  |
| Tryptophan                  | 168.63 | 179.87 | 167.73 | 104.43 | 128.54 | 311.62 | 103.32 | 208.74 | 98.07  | 125.29 | 93.16  | 153.58  |
| Valine                      | 123.90 | 131.55 | 134.13 | 136.13 | 130.67 | 127.43 | 142.93 | 170.42 | 47.51  | 150.38 | 148.31 | 131.21  |
| Phenylalanine<br>+ Tyrosine | 162.58 | 184.49 | 172.91 | 175.78 | 164.44 | 172.94 | 165.42 | 191.90 | 125.26 | 193.99 | 145.87 | 168.69  |
| Average                     | 137.43 | 156.22 | 142.05 | 141.12 | 126.39 | 151.29 | 135.63 | 162.91 | 114.65 | 152.60 | 118.83 | 139.92  |
